# Supplementary material
Source: PubMed Central journal article supplement (PMC7340762)
Supplement: 10900_2020_882_MOESM1_ESM.pdf [file 10900_2020_882_MOESM1_ESM.pdf]

استبيان لقياس معرفة واتجاهات العاملين بالمستشفيات عن فيروس كورونا  
المستجد (مرض كوفيد-١٩)

البيانات الأساسية

|                           |                                                                                                                     |
|---------------------------|---------------------------------------------------------------------------------------------------------------------|
| السن.....                 | النوع<br>١، ذكر<br>٢. أنثى                                                                                          |
| الوظيفة                   | ١. ممرض ٢. فني ٣. موظف ٤. طبيب ٥. صيدلي ٦. عامل                                                                     |
| مكان العمل                | ١. مستشفى جامعس ٢. مستشفى عام ٣. مستشفى صدر ٤. مستشفى حميات ٥. مستشفى مركزي ٦. رعاية صحية اولبة                     |
| القسم الذى أعمل به.....   | المؤهل الدراسى<br>١. دراسات عليا ٢. بكالوريوس ٣. معهد فني ٤. دبلوم ٥. غير متعلم ٦. اخري                             |
| مصدر معلوماتى عن كوفيد ١٩ | ١. موقع وزارة الصحة على الانترنت ٢. وسائل التواصل الاجتماعى ٣. الجرائد ٤. التلفزيون ٥. الاطباء ٦. الاصدقاء ٧. تدريب |

معلومات عامة عن فيروس كورونا المستجد المسبب مرض كوفيد ١٩

| لا أعرف | لا | نعم                                                                   |
|---------|----|-----------------------------------------------------------------------|
|         |    | ١. كوفيد ١٩ مرض فيروسى                                                |
|         |    | ٢. كوفيد ١٩ ينتقل بالتعامل المباشر مع الاشخاص المصابين                |
|         |    | ٣. كوفيد ١٩ ينتقل بالتعامل المباشر مع الحيوانات الاليفة               |
|         |    | ٤. مدة حضانة المرض ٢ الي ١٤ يوم                                       |
|         |    | ٥. كوفيد ١٩ له تطعيم متوفر حاليا                                      |
|         |    | ٦. كوفيد ١٩ علاجه الاساسى المضادات الحيوية                            |
|         |    | ٧. الاشخاص المصابين بأمراض مزمنة أكثر عرضة للإصابة بالعدوى ومضاعفاتها |
|         |    | ٨. كبار السن أكثر عرضة للإصابة بالعدوى ومضاعفاتها                     |
|         |    | ٩. العاملين بالمجال الصحى أكثر عرضة للإصابة بالعدوى                   |
|         |    | ١٠. كوفيد ١٩ دائما يؤدي للوفاة                                        |
|         |    | ١١. كوفيد ١٩ ينتقل عن طريق الرذاذ                                     |
|         |    | ١٢. كوفيد ١٩ ينتقل عن طريق لدغ البعوض                                 |

|     |                                                            |  |  |
|-----|------------------------------------------------------------|--|--|
| ١٣. | كوفيد ١٩ ينتقل عن طريق الطعام والشراب الملوث               |  |  |
| ١٤. | السخونة و الكحة و صعوبة التنفس من اعراض الاصابة ب كوفيد ١٩ |  |  |
| ١٥. | كوفيد ١٩ ممكن ان يزيد الي التهاب رئوي و فشل التنفس         |  |  |

| لا اعرف | لا | نعم | ١٧. للوقاية من الاصابة بفيروس كورونا المستجد يجب |
|---------|----|-----|--------------------------------------------------|
|         |    |     | أ- غسل الايدي بالماء والصابون او الكحول          |
|         |    |     | ب- تجنب لمس العينين والانف والفم                 |
|         |    |     | ت- لبس الماسك (الكمامة)                          |
|         |    |     | ث- تغطية الانف والفم اثناء السعال                |
|         |    |     | ج- تجنب الاماكن المزدحمة                         |
|         |    |     | ح- تنظيف الاسطح باستمرار                         |
|         |    |     | خ- المحافظة علي مسافة علي الاقل متر بين الافراد  |
|         |    |     | د- غسل الانف او الغرغرة بمحلول ملحي              |
|         |    |     | ذ- تجنب التلامس المباشر مع زملاءك                |

### ما هورايك بصراحة

| الأسئلة                                                                                | موافق جدا | موافق | غير متأكد | غير موافق | غير موافق تماما |
|----------------------------------------------------------------------------------------|-----------|-------|-----------|-----------|-----------------|
| ١. كوفيد (الكرونا) ١٩ مرض خطير                                                         |           |       |           |           |                 |
| ٢. كوفيد ١٩ (الكرونا) مرض يمكن الوقاية منه                                             |           |       |           |           |                 |
| ٣. الالتزام بالماسك واللبس الواقي و غسل الايدي بالماء والصابون يجنبنا الاصابة بالكرونا |           |       |           |           |                 |
| ٤. حالات كرونا فى مصر تزداد.                                                           |           |       |           |           |                 |
| ٥. أثق في قدرة الدولة علي الحد من انتشار مرض الكرونا.                                  |           |       |           |           |                 |
| ٦. أثق في والمعلومات التي يصرح بها المسئولون عن مرض الكرونا.                           |           |       |           |           |                 |
| ٧. هناك كثيرون اصابوا بمرض كوفيد ١٩ وتم شفاؤهم او توفوا بدون تشخيص اصابتهم             |           |       |           |           |                 |
| ٨. الجهود التي تقوم بها الدولة تعتبر ضخمة وكافية لمكافحة                               |           |       |           |           |                 |

|  |  |  |  |  |                                                                 |
|--|--|--|--|--|-----------------------------------------------------------------|
|  |  |  |  |  | المرض.                                                          |
|  |  |  |  |  | ٩. يتم تشخيص المرض في مصر بطريقة دقيقة                          |
|  |  |  |  |  | ١٠. أثق في قدرة مستشفيات العزل المصرية على علاج مرض كوفيد<br>١٩ |

### الشعور بالخطر تجاه الإصابة بفيروس كورونا المستجد

| غير موافق<br>تماما                                     | غير موافق | غير<br>متأكد | موافق | موافق<br>جدا |                                                                                                      |
|--------------------------------------------------------|-----------|--------------|-------|--------------|------------------------------------------------------------------------------------------------------|
|                                                        |           |              |       |              | ١. أنا أكثر عرضة من الآخرين للإصابة ب كوفيد ١٩                                                       |
|                                                        |           |              |       |              | ٢. أنا خائفة من التعرض للعدوى بكوفيد ١٩                                                              |
| <b>احتمالية اصابتى بالعدوى بكوفيد ١٩ عالية نتيجة ل</b> |           |              |       |              |                                                                                                      |
|                                                        |           |              |       |              | أ- أنه مرض جديد و لاتوجد معلومات كافية عن طرق انتقال العدوى                                          |
|                                                        |           |              |       |              | ب- ملابس الوقاية (الماسك -الجوانتى- الجاون) غير متوفرة                                               |
|                                                        |           |              |       |              | ت- أنا غير معتادة على استخدام ملابس الوقاية (الماسك - الجوانتى-الجاون)                               |
|                                                        |           |              |       |              | ث- أنا غير مدربة على استخدام ملابس الوقاية (الماسك - الجوانتى-الجاون)                                |
|                                                        |           |              |       |              | ج- ملابس الوقاية (الماسك - الجوانتى- الجاون) غير كافية للحماية من العدوى                             |
|                                                        |           |              |       |              | ح- (الازدحام) فى المستشفى أو فى المكان الذى أعمل به يساعد أو ملائم لنقل العدوى                       |
|                                                        |           |              |       |              | خ- (سوء التهوية) فى المستشفى أو فى المكان الذى أعمل به يساعد أو ملائم لنقل العدوى                    |
|                                                        |           |              |       |              | د- الناس (الجمهور الذى نتعامل معه فى أماكن العمل) غير متلزمين بإجراءات الوقاية أو اجراءات منع العدوى |
| <b>اخاف من التعرض للعدوى بكوفيد ١٩ بسبب</b>            |           |              |       |              |                                                                                                      |
|                                                        |           |              |       |              | أ- أنه مرض جديد ليس له علاج معروف                                                                    |
|                                                        |           |              |       |              | ب- أنه مرض جديد ليس له تطعيم (لقاح) أو مصل                                                           |
|                                                        |           |              |       |              | ت- أنه مرض سهل الانتشار                                                                              |
|                                                        |           |              |       |              | ث- أنه مرض ممكن أن يؤدي للوفاة                                                                       |
|                                                        |           |              |       |              | ج- لأنى ممكن أن أنقل العدوى لعائلتى                                                                  |
|                                                        |           |              |       |              | ح- لأنى مصاب بمرض مزمن                                                                               |
|                                                        |           |              |       |              | خ- لأن الناس يعاملون المصابين بالعدوى معاملة سيئة                                                    |
|                                                        |           |              |       |              | د- لأن استجابة السلطات الصحية لهذا المرض غير مرضية                                                   |
|                                                        |           |              |       |              | ذ- لأنى اخشى دخول مستشفى العزل والبعد عن اسرتى                                                       |
